# Supplementary material for: Elevated levels of proinflammatory volatile metabolites in feces of high fat diet fed KK-Ay mice
Source: PubMed Central journal article supplement (PMC7105489; doi:10.1038/s41598-020-62541-7), 2020-03-30
Supplement: 41598_2020_62541_MOESM1_ESM.pdf [file 41598_2020_62541_MOESM1_ESM.pdf]

Supplemental Table 6. Dietary composition of AIN76 and HFD32 used in this study

| <b>AIN76</b>        |     | <b>HFD32</b>                  |       |
|---------------------|-----|-------------------------------|-------|
| Ingredient          | (%) | Ingredient                    | (%)   |
| Milk Casein         | 20  | Milk Casein                   | 24.5  |
| DL-methionine       | 0.3 | Egg white                     | 5     |
|                     |     | L-cystine                     | 0.43  |
| Corn oil            | 5   | Beef tallow powder            | 15.88 |
|                     |     | High oleic acid safflower oil | 20    |
| Corn starch         | 15  | Cellulose                     | 5.5   |
| Sucrose             | 50  | Maltodextrin                  | 8.25  |
| Cellulose powder    | 5   | Lactose                       | 6.928 |
|                     |     | Sucrose                       | 6.75  |
| AIN-93 vitamin mix  | 1   | AIN-93 vitamin mix            | 1.4   |
| AIN-93G mineral mix | 3.5 | AIN-93 mineral mix            | 5     |
| Choline bitartrate  | 0.2 | Choline bitartrate            | 0.36  |
|                     |     | t-Butylhydroquinone           | 0.002 |
|                     | 100 |                               | 100   |
