# Supplementary material for: Elevated levels of proinflammatory volatile metabolites in feces of high fat diet fed KK-Ay mice
Source: PubMed Central journal article supplement (PMC7105489; doi:10.1038/s41598-020-62541-7), 2020-03-30
Supplement: 41598_2020_62541_MOESM2_ESM.pdf [file 41598_2020_62541_MOESM2_ESM.pdf]

## Figure S1. Uchikawa *et al.*

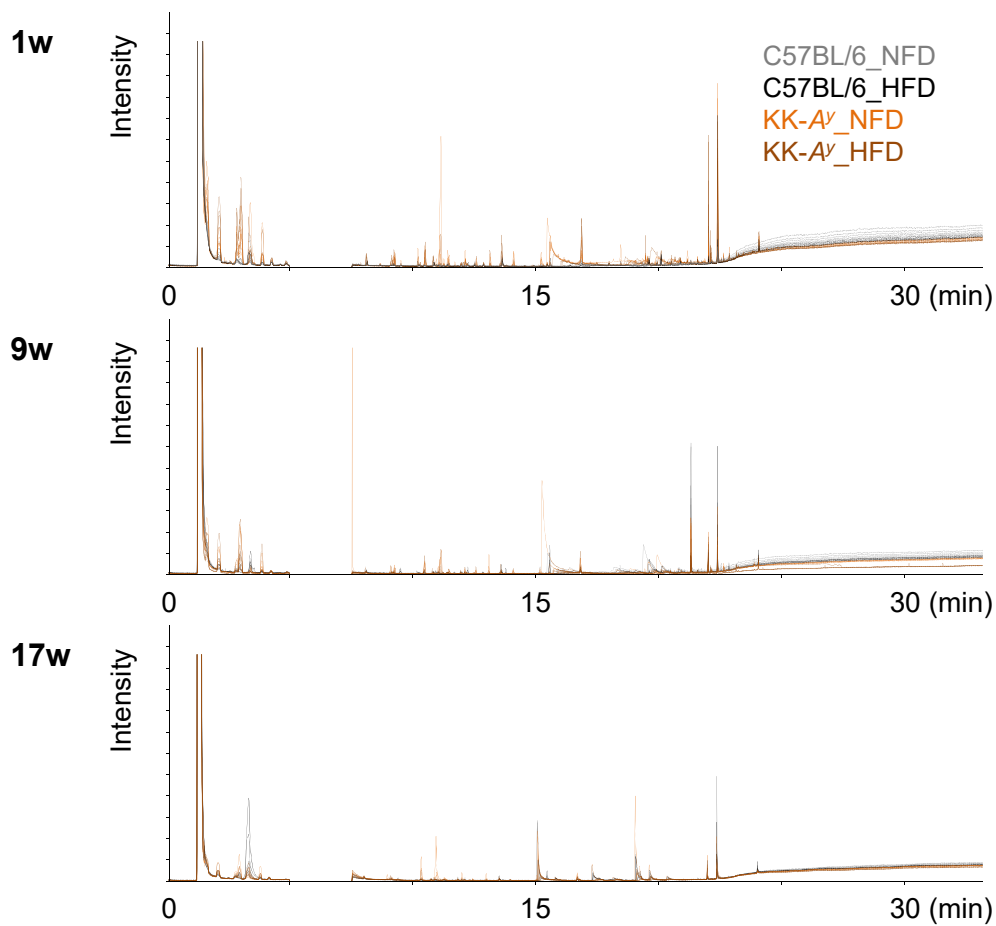

Figure S1. Typical chromatograms of HSS-GC-MS analyses for mouse feces collected from C57BL/6\_NFD (gray, n=5), C57BL/6\_HFD (black, n=5), KK-A<sup>y</sup>\_NFD (orange, n=5), and KK-A<sup>y</sup>\_HFD (brown, n=5) groups at weeks 1, 9, and 17.
