# Supplementary material for: Elevated levels of proinflammatory volatile metabolites in feces of high fat diet fed KK-Ay mice
Source: PubMed Central journal article supplement (PMC7105489; doi:10.1038/s41598-020-62541-7), 2020-03-30
Supplement: 41598_2020_62541_MOESM3_ESM.pdf [file 41598_2020_62541_MOESM3_ESM.pdf]

**Figure S2. Uchikawa et al.**

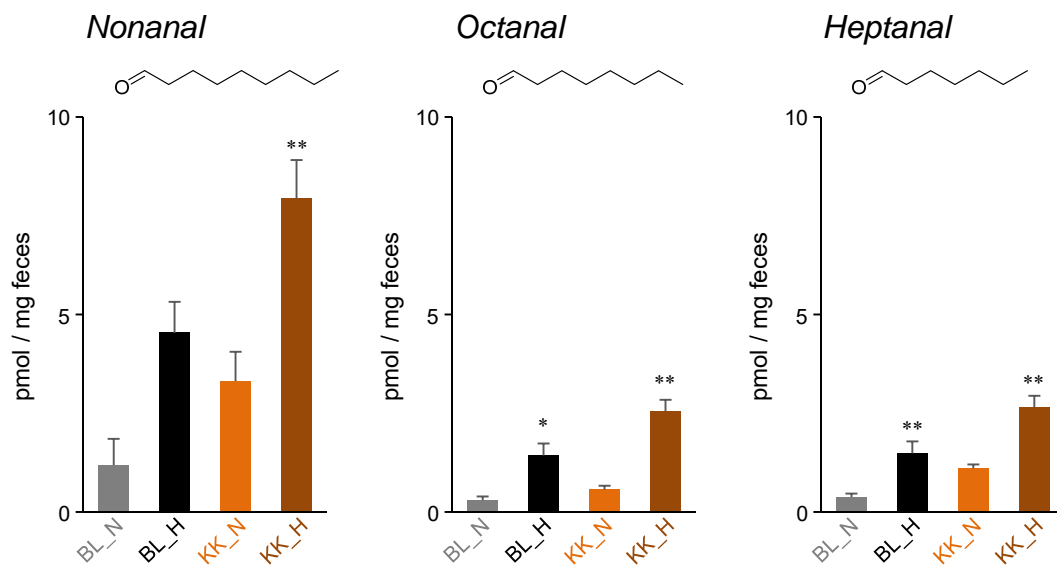

Figure S2. LC-MS analysis of fecal lipid aldehyde. To exclude the possibility that nonanal was artificially generated from fecal fat by heating in HSS at 100° C for 60 min, feces collected at week 1 from BL\_N (gray, n=5), BL\_H (black, n=5), KK\_N (orange, n=5), and KK\_H (brown, n=5) groups were prepared by CHCl<sub>3</sub>/MeOH extraction without heating. Samples were derived with dansyl hydrazine, then subjected to LC-MS<sup>39</sup>. Data are the means  $\pm$  SEM (n=5). Significant difference; \* $p < 0.05$ , \*\* $p < 0.01$  compared with BL\_N (gray bar) at each week by one-way ANOVA with post hoc test (Bonferroni). High levels of nonanal, octanal and heptanal were detected by LC-MS analyses, indicating that the high level of nonanal detected by HSS-GC-MS was not a heat degradation product of fecal fat.
