# Supplementary material for: Elevated levels of proinflammatory volatile metabolites in feces of high fat diet fed KK-Ay mice
Source: PubMed Central journal article supplement (PMC7105489; doi:10.1038/s41598-020-62541-7), 2020-03-30
Supplement: 41598_2020_62541_MOESM4_ESM.pdf [file 41598_2020_62541_MOESM4_ESM.pdf]

## Figure S3. Uchikawa *et al.*

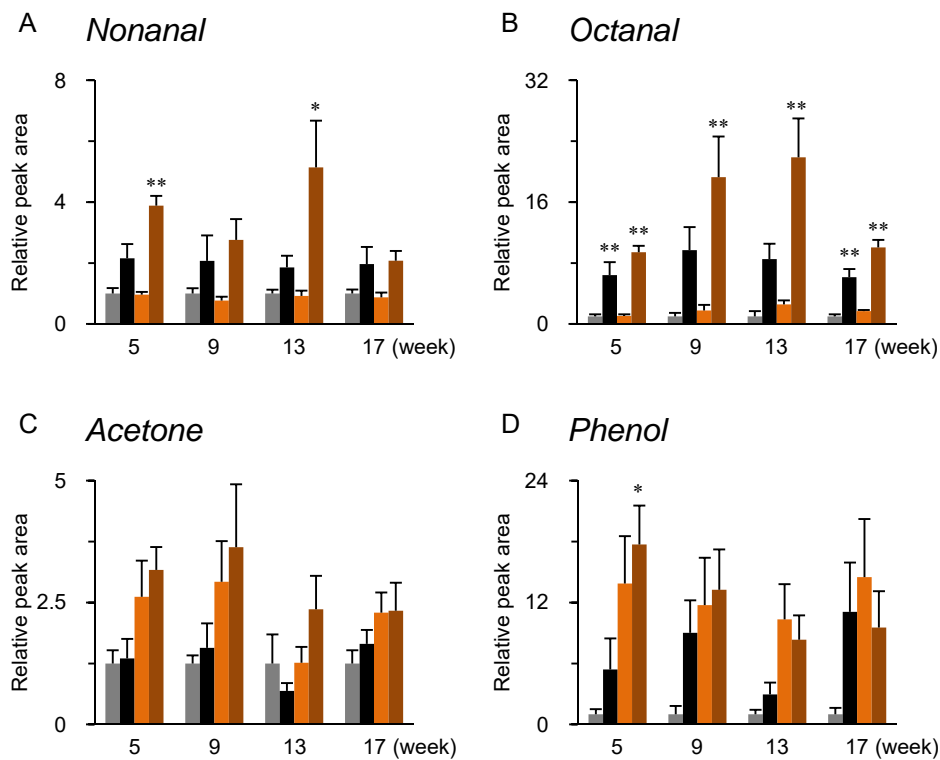

Figure S3. Fecal levels of nonanal (A), octanal (B), acetone (C), and phenol (D). VOCs in feces collected from BL\_N (gray), BL\_H (black), KK\_N (orange), and KK\_H (brown) groups at the indicated timepoints were determined by HSS-GC-MS. Relative peak areas were normalized to a value of 1 for BL\_N at week 5. Data are the means  $\pm$  SEM (n=5). Significant difference; \* $p < 0.05$ , \*\* $p < 0.01$  compared with BL\_N (gray bar) at each week by one-way ANOVA with post hoc test (Bonferroni).
