# Supplementary material for: Elevated levels of proinflammatory volatile metabolites in feces of high fat diet fed KK-Ay mice
Source: PubMed Central journal article supplement (PMC7105489; doi:10.1038/s41598-020-62541-7), 2020-03-30
Supplement: 41598_2020_62541_MOESM5_ESM.pdf [file 41598_2020_62541_MOESM5_ESM.pdf]

Supplemental Table 1. List of VOCs analyzed by PCA at week 1.

| RT (min) | Base peak | Name                  | PC 1<br>(32.56%) | PC 2<br>(17.65%) | <i>p</i> (two-way ANOVA) |         |         |
|----------|-----------|-----------------------|------------------|------------------|--------------------------|---------|---------|
|          |           |                       |                  |                  | Diet                     | Lineage | DL      |
| 1.43     | 28        |                       | 0.84             | 1.50             |                          |         |         |
| 1.44     | 252       |                       | 2.02             | 1.36             |                          |         |         |
| 1.46     | 32        |                       | 1.54             | 1.85             |                          |         |         |
| 1.46     | 45        |                       | 3.53             | 0.52             |                          |         |         |
| 1.49     | 31        |                       | -1.92            | 0.80             |                          |         |         |
| 1.50     | 58        |                       | 0.72             | -1.76            |                          |         |         |
| 1.52     | 17        |                       | -1.52            | 0.92             |                          |         |         |
| 1.61     | 47        |                       | -2.23            | 1.33             |                          |         |         |
| 1.66     | 29        | Acetaldehyde          | -3.57            | -1.30            |                          | 7.8E-03 |         |
| 1.73     | 236       |                       | 2.63             | 0.94             |                          |         |         |
| 2.14     | 43        | Acetone               | -4.13            | -0.13            |                          | 2.2E-03 |         |
| 2.16     | 41        |                       | -3.50            | -0.31            |                          | 4.5E-04 |         |
| 2.17     | 43        | 2-Methyl-propanal     | 2.10             | -2.45            |                          |         |         |
| 2.58     | 82        |                       | -2.00            | 2.40             |                          |         |         |
| 2.87     | 43        | 2-Butanone            | -3.30            | 0.77             |                          |         |         |
| 2.88     | 43        |                       | -2.39            | 0.62             |                          |         |         |
| 2.89     | 31        | 3-Methyl-1-butanol    | -0.71            | 0.56             |                          |         |         |
| 2.94     | 31        | 1-Pentanol            | -0.23            | 0.01             |                          |         |         |
| 3.04     | 41        | 2-Methyl-butanal      | -3.63            | -1.46            |                          | 3.6E-04 |         |
| 3.06     | 44        | 3-Methyl-butanal      | -3.96            | -1.15            |                          | 4.1E-03 |         |
| 3.37     | 31        |                       | 0.26             | 2.66             |                          |         |         |
| 3.38     | 31        | Ethanol               | 1.39             | 2.89             |                          |         |         |
| 3.45     | 97        | 3-Octadecene          | -3.40            | -1.43            |                          |         |         |
| 3.46     | 126       | 5-Octadecene          | -3.31            | -2.18            |                          | 3.9E-03 |         |
| 3.91     | 43        |                       | -3.38            | -0.67            |                          | 2.5E-02 |         |
| 3.91     | 43        | 2-Pentanone           | -2.73            | 1.56             |                          |         |         |
| 4.29     | 41        | Acetonitrile          | -0.28            | 2.00             |                          |         |         |
| 4.88     | 75        | Methional             | -1.33            | -0.92            |                          |         |         |
| 4.99     | 28        |                       | -2.18            | 1.27             |                          |         |         |
| 7.57     | 18        |                       | -0.25            | -1.34            |                          |         |         |
| 8.15     | 70        | Heptanal              | -2.77            | 0.38             |                          |         |         |
| 8.54     | 79        | Pyridine              | -2.58            | 1.83             |                          |         |         |
| 8.70     | 84        | 3-Methyl-2-butenal    | -2.35            | -1.69            |                          |         |         |
| 9.22     | 81        | 2-Pentyl-furan        | -1.33            | 1.10             |                          |         |         |
| 10.08    | 55        | 3-Methyl-1-butanol    | -3.61            | -0.22            | 4.9E-03                  | 4.0E-04 | 2.3E-02 |
| 10.24    | 56        | 3-Methyl-3-buten-1-ol | -1.09            | -2.56            |                          |         |         |
| 10.31    | 55        | 1-Pentanol            | -3.08            | 2.63             | 1.7E-03                  |         |         |
| 10.52    | 94        | Methyl pyrazine       | -3.90            | -1.23            |                          | 4.3E-03 |         |
| 11.13    | 45        | Acetoin               | -2.34            | -2.53            |                          |         |         |
| 11.48    | 43        | 1-Hydroxy-2-propanone | -3.23            | -1.47            |                          |         |         |
| 12.07    | 108       | 2,6-Dimethyl pyradine | -3.56            | -1.82            |                          | 4.8E-06 |         |
| 12.54    | 341       |                       | 1.69             | -1.73            |                          |         |         |
| 12.61    | 108       |                       | -3.19            | -0.34            |                          | 3.7E-02 |         |
| 12.90    | 56        | 1-Hexanol             | -3.21            | 1.09             |                          |         |         |
| 13.17    | 126       | Dimethyl trisulfide   | -3.45            | -1.79            |                          | 1.9E-05 |         |
| 13.57    | 58        | 2-Nonanone            | -3.10            | 2.12             |                          |         |         |
| 13.66    | 57        | Nonanal               | -3.53            | 2.34             | 1.7E-03                  |         |         |
| 14.13    | 122       | Trimethyl pyrazine    | -2.25            | -1.92            |                          |         |         |
| 15.25    | 48        | Methional             | -0.23            | -3.96            | 1.1E-03                  |         |         |
| 15.48    | 96        | Furfural              | -0.85            | -3.20            |                          |         |         |
| 15.49    | 70        | Heptyl formate        | -2.50            | 2.31             |                          |         |         |

|       |                                    |       |       |         |         |         |
|-------|------------------------------------|-------|-------|---------|---------|---------|
| 15.78 | 60 Acetic acid                     | -1.07 | -3.59 |         |         |         |
| 16.17 | 120                                | -2.50 | -2.03 | 4.1E-02 |         |         |
| 16.39 | 57                                 | -2.86 | 1.85  | 3.3E-02 |         |         |
| 16.84 | 281                                | 1.34  | -2.24 |         |         |         |
| 16.89 | 106 Benzaldehyde                   | -3.69 | -0.97 |         |         |         |
| 17.51 | 55 1-Dodecanol                     | -3.11 | 2.14  |         |         |         |
| 18.01 | 56 1-Octanol                       | -3.08 | 2.28  |         |         |         |
| 19.49 | 61                                 | -3.84 | -0.79 | 7.1E-04 |         |         |
| 19.58 | 56                                 | -2.72 | -0.78 |         |         |         |
| 19.65 | 82                                 | -1.94 | 2.88  | 1.0E-06 |         |         |
| 19.96 | 85 $\gamma$ -Caprolactone          | -2.12 | 2.40  |         |         |         |
| 20.05 | 60 Butanoic acid                   | -3.16 | 0.21  |         |         |         |
| 20.12 | 83 3-Octadecene                    | -1.79 | 3.54  | 1.2E-21 |         |         |
| 20.28 | 73                                 | -3.09 | -0.52 |         |         |         |
| 20.38 | 97                                 | -2.80 | 2.04  |         |         |         |
| 20.91 | 83 5-Octadecene                    | -2.37 | 2.17  | 1.9E-04 |         |         |
| 21.27 | 69 Farnesol                        | -2.48 | -1.87 |         |         |         |
| 21.33 | 71                                 | 2.42  | -1.44 |         |         |         |
| 21.60 | 82                                 | -0.39 | -2.62 |         |         |         |
| 21.83 | 69                                 | -1.48 | -3.04 |         |         |         |
| 22.05 | 94 Phenol                          | -3.64 | 0.03  | 2.3E-14 | 1.3E-15 | 1.7E-12 |
| 22.13 | 58 2-Pentadecanone                 | -3.49 | 1.00  |         |         |         |
| 22.16 | 135 1,2-Benzisothiazol             | -2.71 | 1.29  |         |         |         |
| 22.40 | 119                                | -0.29 | -1.71 |         |         |         |
| 22.42 | 107 p-Cresol                       | -2.95 | -1.99 |         |         |         |
| 22.66 | 82 Tetradecanal                    | -1.28 | -2.54 |         |         |         |
| 22.89 | 69                                 | -0.87 | -3.42 |         |         |         |
| 22.89 | 93 6-Methyl-2-pyridinecarbaldehyde | -2.13 | -0.12 |         |         |         |
| 22.90 | 69                                 | -0.23 | -3.45 |         |         |         |
| 23.83 | 55                                 | -2.20 | 1.26  |         |         |         |
| 24.10 | 117 Indolizine                     | -2.50 | 0.10  |         |         |         |
