# Supplementary material for: Elevated levels of proinflammatory volatile metabolites in feces of high fat diet fed KK-Ay mice
Source: PubMed Central journal article supplement (PMC7105489; doi:10.1038/s41598-020-62541-7), 2020-03-30
Supplement: 41598_2020_62541_MOESM8_ESM.pdf [file 41598_2020_62541_MOESM8_ESM.pdf]

Supplemental Table 4. List of VOCs analyzed by PCA at week 13.

| RT (min) | Base peak | Name                       | PC 1<br>(21.39%) | PC 2<br>(12.63%) | <i>p</i> (two-way ANOVA) |         |         |
|----------|-----------|----------------------------|------------------|------------------|--------------------------|---------|---------|
|          |           |                            |                  |                  | Diet                     | Lineage | DL      |
| 1.43     | 252       |                            | -0.60            | 2.09             |                          |         |         |
| 1.44     | 31        |                            | 1.62             | -1.90            |                          |         |         |
| 1.44     | 43        | 2,3-Butanedione            | 0.76             | 3.11             |                          |         |         |
| 1.44     | 31        |                            | -1.65            | 0.27             |                          |         |         |
| 1.48     | 58        | Methylamine, N,N-dimethyl- | -0.18            | 1.47             |                          |         |         |
| 1.62     | 42        |                            | 1.72             | -1.16            |                          |         |         |
| 1.64     | 44        | Pentanal                   | 2.28             | 0.83             |                          |         |         |
| 1.68     | 29        | Acetaldehyde               | 1.32             | 0.86             |                          |         |         |
| 2.14     | 43        | Acetone                    | 3.86             | 1.37             |                          |         |         |
| 2.56     | 82        |                            | 1.55             | -2.44            |                          |         |         |
| 2.83     | 43        | 2-Butanone                 | 2.47             | 0.83             |                          |         |         |
| 2.87     | 43        | 2-Hexanone, 4-methyl-      | 1.18             | 0.74             |                          |         |         |
| 3.00     | 31        | Ethanol                    | 0.95             | -0.51            |                          |         |         |
| 3.03     | 44        |                            | 2.01             | 1.51             |                          |         |         |
| 3.06     | 44        | Butanal, 3-methyl-         | 4.05             | 0.71             |                          | 6.0E-03 |         |
| 3.33     | 45        |                            | 2.00             | 1.61             |                          |         |         |
| 3.45     | 31        | 1-Propene, 3-propoxy-      | 2.31             | 1.35             |                          |         |         |
| 3.87     | 29        |                            | 2.01             | -2.60            |                          |         |         |
| 4.24     | 41        | Acetonitrile               | -0.41            | 1.84             |                          |         |         |
| 4.93     | 75        |                            | 0.61             | 3.02             |                          |         |         |
| 4.99     | 28        |                            | -0.39            | -0.91            |                          |         |         |
| 7.57     | 18        |                            | 0.47             | 0.50             |                          |         |         |
| 7.80     | 56        | 1-Butanol                  | -2.01            | -0.07            |                          |         |         |
| 8.09     | 70        | Heptanal                   | 3.22             | -2.34            |                          | 7.8E-04 |         |
| 8.13     | 43        |                            | -1.78            | 0.78             |                          |         |         |
| 9.09     | 80        | 1,3-Diazine                | 2.40             | -0.74            |                          |         |         |
| 9.21     | 81        | Furan, 2-pentyl-           | 1.61             | -2.10            |                          |         |         |
| 10.27    | 55        | 1-Pentanol                 | 2.55             | -0.48            |                          |         |         |
| 10.47    | 94        | Pyrazine, methyl-          | 3.96             | 0.95             |                          | 1.4E-02 |         |
| 10.81    | 56        | Octanal                    | 3.28             | -2.35            | 1.6E-16                  | 1.6E-16 | 1.6E-16 |
| 10.85    | 57        |                            | -1.81            | -1.13            |                          |         |         |
| 11.07    | 45        | Acetoin                    | 0.04             | 1.00             |                          |         |         |
| 12.11    | 108       | Pyrimidine, 4,6-dimethyl-  | 2.99             | 2.63             |                          |         |         |
| 12.19    | 107       |                            | 3.01             | -0.76            |                          |         |         |
| 12.86    | 56        | 1-Hexanol                  | 1.71             | -1.90            |                          |         |         |
| 13.08    | 126       | Dimethyl trisulfide        | 3.15             | 1.51             |                          |         |         |
| 13.62    | 57        | Nonanal                    | 0.83             | 0.29             |                          |         |         |
| 15.16    | 48        |                            | 1.91             | 2.94             |                          |         |         |
| 16.81    | 106       | Benzaldehyde               | 3.29             | 1.00             |                          |         |         |
| 16.82    | 281       |                            | -1.36            | 1.49             |                          |         |         |
| 19.63    | 355       |                            | 0.03             | 2.02             |                          |         |         |
| 19.74    | 60        | Butanoic acid              | -0.08            | -2.63            |                          |         |         |
| 20.18    | 60        |                            | 0.05             | 0.88             |                          |         |         |
| 21.32    | 71        |                            | -1.66            | 2.05             |                          |         |         |
| 22.02    | 94        | Phenol                     | 2.93             | 0.09             |                          |         |         |
| 22.40    | 107       | p-Cresol                   | -2.02            | 1.56             |                          |         |         |
| 22.68    | 82        | Hexadecanal                | -0.47            | 0.08             |                          |         |         |
| 23.25    | 139       |                            | 2.21             | -0.55            |                          |         |         |
| 24.06    | 117       | Indole                     | 1.56             | -0.59            |                          |         |         |
