# Supplementary material for: Elevated levels of proinflammatory volatile metabolites in feces of high fat diet fed KK-Ay mice
Source: PubMed Central journal article supplement (PMC7105489; doi:10.1038/s41598-020-62541-7), 2020-03-30
Supplement: 41598_2020_62541_MOESM9_ESM.pdf [file 41598_2020_62541_MOESM9_ESM.pdf]

Supplemental Table 5. List of VOCs analyzed by PCA at week 17.

| RT (min) | Base peak | Name                   | PC 1<br>(20.33%) | PC 2<br>(14.09%) | <i>p</i> (two-way ANOVA) |         |         |
|----------|-----------|------------------------|------------------|------------------|--------------------------|---------|---------|
|          |           |                        |                  |                  | Diet                     | Lineage | DL      |
| 1.40     | 32        |                        | 0.62             | -0.08            |                          |         |         |
| 1.42     | 252       |                        | 1.68             | 1.35             |                          |         |         |
| 1.52     | 17        |                        | 2.81             | 0.29             |                          |         |         |
| 1.61     | 29        | Acetaldehyde           | 1.32             | 1.56             |                          |         |         |
| 1.68     | 44        |                        | 2.87             | -1.15            |                          |         |         |
| 2.12     | 43        | Acetone                | 4.05             | 0.06             |                          |         |         |
| 2.53     | 82        |                        | 1.64             | 2.12             |                          |         |         |
| 2.81     | 43        | 2-Butanone             | 2.97             | -1.37            |                          |         |         |
| 2.87     | 31        | Methyl Alcohol         | -1.63            | -0.98            |                          |         |         |
| 2.97     | 57        |                        | 2.26             | -0.12            |                          |         |         |
| 3.00     | 41        | 2-methyl Butanal       | 3.53             | -0.85            |                          |         |         |
| 3.01     | 44        | 3-methyl Butanal       | 2.36             | 0.60             |                          |         |         |
| 3.29     | 263       |                        | -0.58            | 0.35             |                          |         |         |
| 3.34     | 31        | Ethanol                | 2.66             | 1.48             |                          |         |         |
| 3.83     | 43        | 2-Pentanone            | -0.48            | 0.70             |                          |         |         |
| 4.18     | 41        | Acetonitrile           | 0.27             | 0.86             |                          |         |         |
| 4.99     | 28        |                        | -1.24            | 0.80             |                          |         |         |
| 8.04     | 43        |                        | -1.25            | 1.70             |                          |         |         |
| 8.06     | 43        |                        | 1.79             | 2.79             |                          |         |         |
| 9.15     | 81        | 2-pentyl Furan         | 0.39             | 3.71             | 2.5E-06                  |         |         |
| 10.77    | 57        | Octanal                | 0.41             | 3.45             | 1.4E-02                  |         |         |
| 10.96    | 43        |                        | -0.26            | -1.74            |                          |         |         |
| 13.01    | 126       |                        | 1.48             | -3.36            |                          |         |         |
| 13.54    | 57        | Nonanal                | 0.83             | 2.51             |                          |         |         |
| 15.07    | 48        |                        | 1.20             | -3.39            |                          |         |         |
| 15.11    | 43        |                        | -1.10            | -1.09            |                          |         |         |
| 16.72    | 106       | Benzaldehyde           | 3.37             | -1.78            |                          |         |         |
| 16.80    | 281       |                        | -3.08            | 0.77             |                          |         | 1.3E-03 |
| 17.47    | 74        |                        | -0.76            | -1.90            |                          |         |         |
| 19.32    | 60        | Butanoic acid          | 2.52             | -1.41            |                          |         |         |
| 19.62    | 355       |                        | -2.27            | -0.72            |                          |         |         |
| 19.71    | 74        | 2-methyl Butanoic acid | 2.57             | 0.48             |                          |         |         |
| 20.44    | 60        | Heptanoic acid         | 0.32             | -0.31            |                          |         |         |
| 22.00    | 94        | Phenol                 | 2.99             | 1.49             | 3.2E-02                  | 1.7E-02 | 1.8E-02 |
| 22.39    | 107       | p-Cresol               | 1.10             | -1.03            |                          |         |         |
| 24.04    | 117       | Indole                 | 1.38             | 0.07             |                          |         |         |
